# Supplementary material
Source: PubMed Central journal article supplement (PMC4235372)
Supplement: ja506289u_si_001.pdf [file ja506289u_si_001.pdf]

# Unraveling the Biomolecular Snapshots of Mitosis in Healthy and Cancer Cells Using Plasmonically- Enhanced Raman Spectroscopy

*Sajanlal R. Panikkanvalappil, Steven M. Hira, Mahmoud A. Mahmoud, and Mostafa A.  
El-Sayed\**

Laser Dynamics Laboratory, School of Chemistry and Biochemistry, Georgia Institute of  
Technology, Atlanta, Georgia 30332-0400, United States.

E-mail: [melsayed@gatech.edu](mailto:melsayed@gatech.edu)

## Supporting information 1

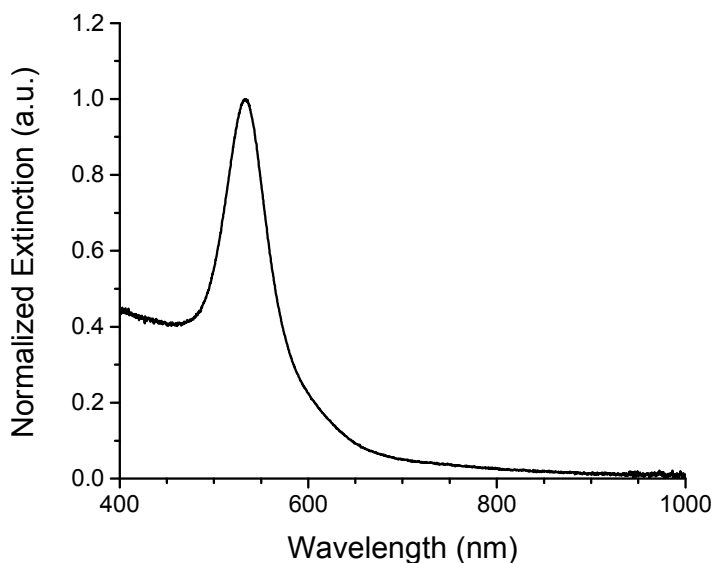

**Figure S1.** Extinction spectrum of Au NCs.

## Supporting information 2

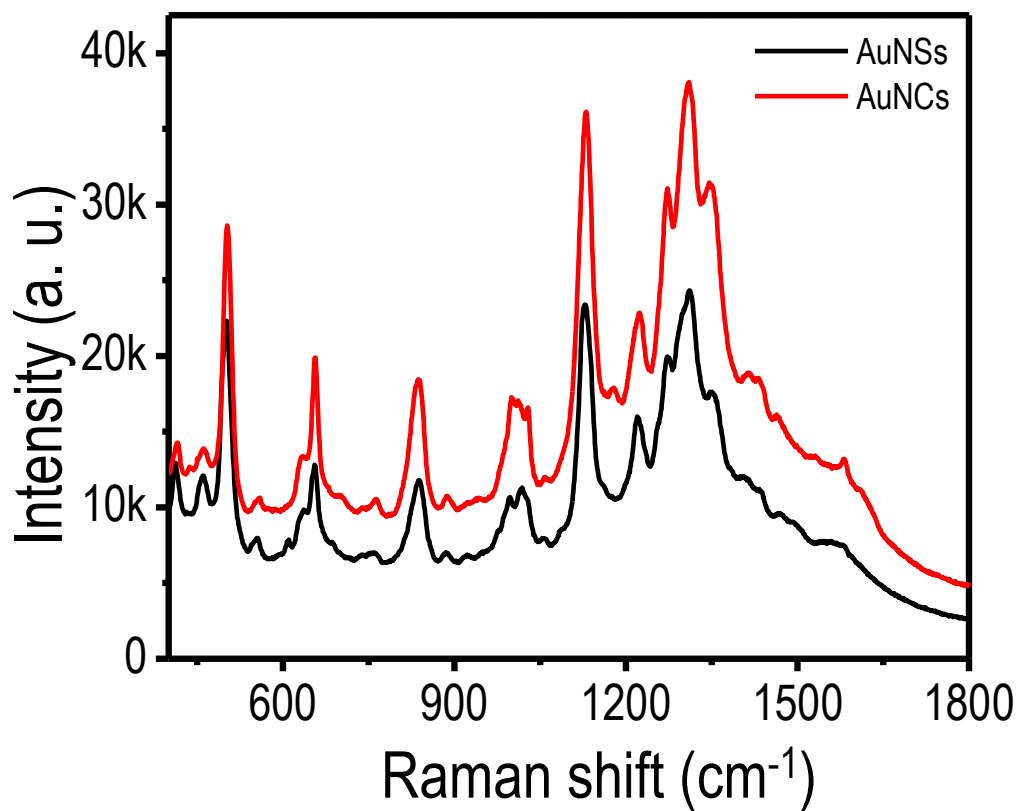

**Figure S2.** SERS spectra of collected from HSC cell at G1 phase using AuNSs (black trace) and AuNCs (red trace).

### Supporting information 3

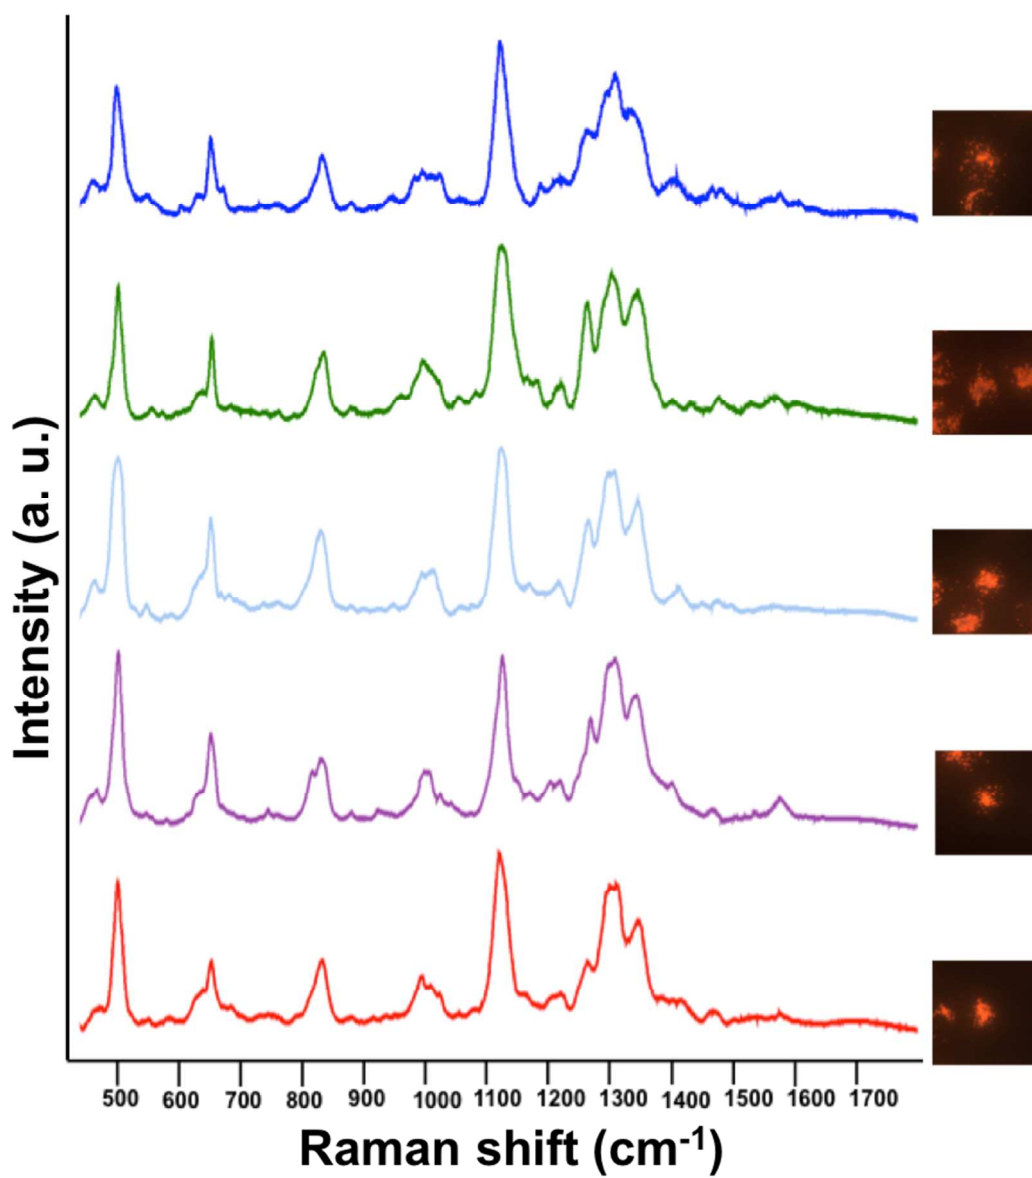

**Figure S3.** SERS spectra collected from different HSC cells (synchronized to G1 phase). Corresponding dark-field images are also given.

#### Supporting information 4

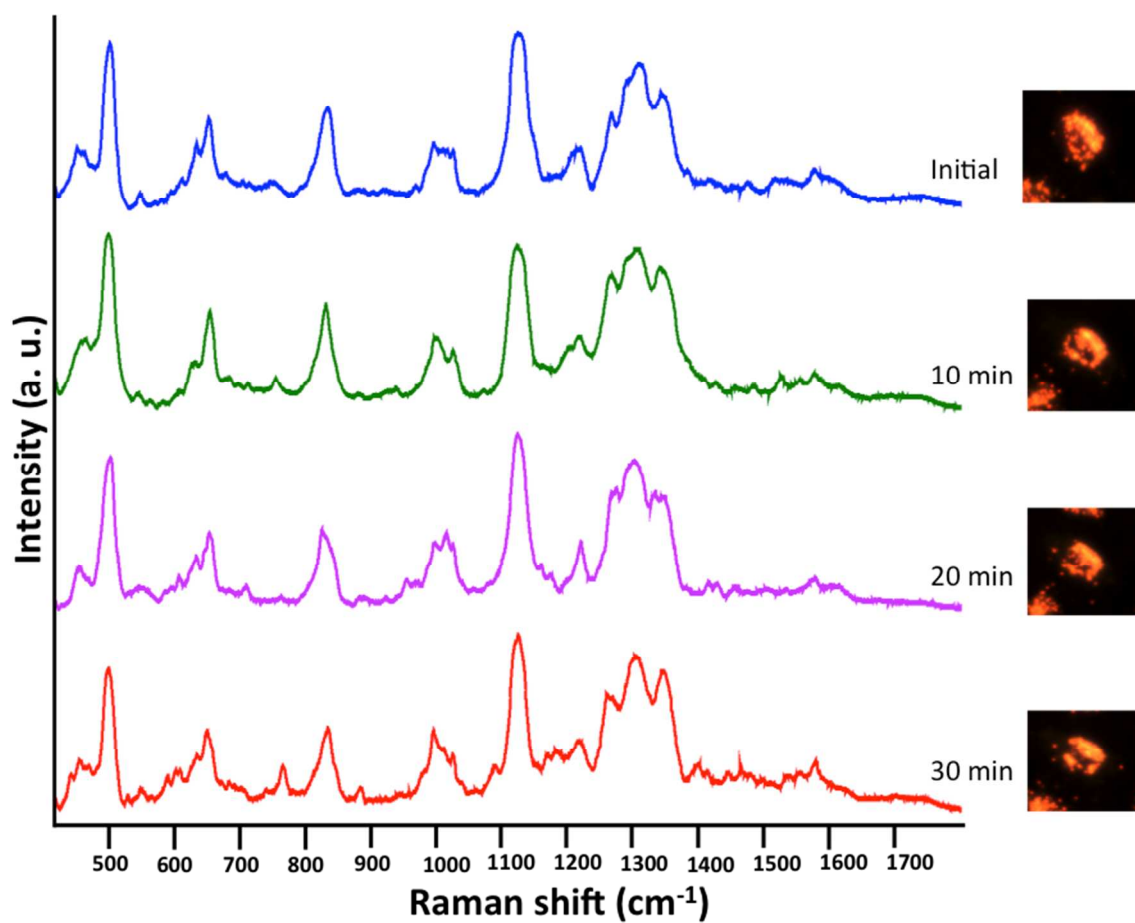

**Figure S4.** SERS spectra collected from a single cell (synchronized to G1 phase) at different time intervals. Corresponding dark-field images are also given.

## Supporting information 5

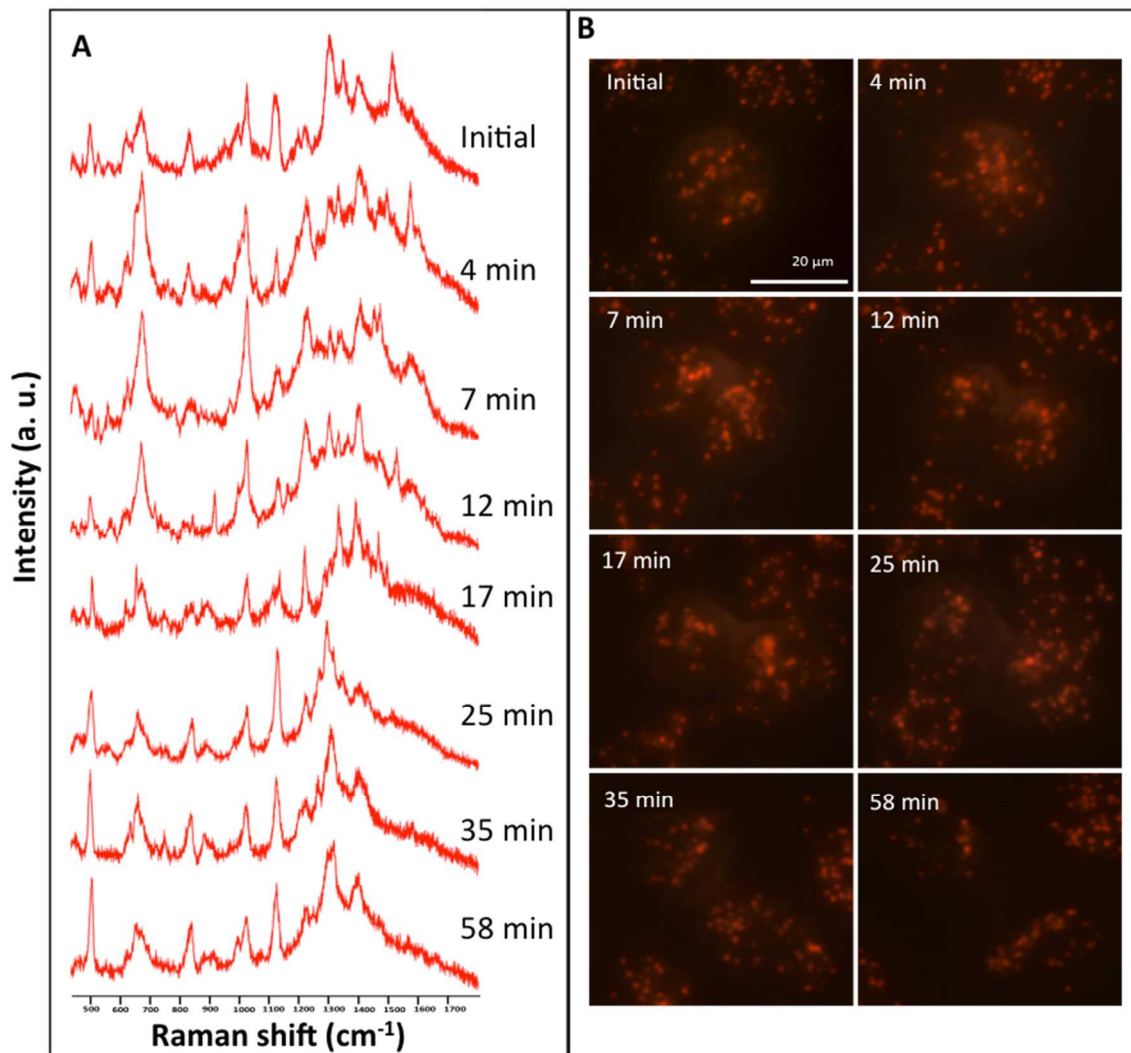

**Figure S5.** Time dependent SERS spectra collected from the HSC cells at different stages of mitosis (A). Dark-field images collected at respective time are also given (B).

## Supporting information 6

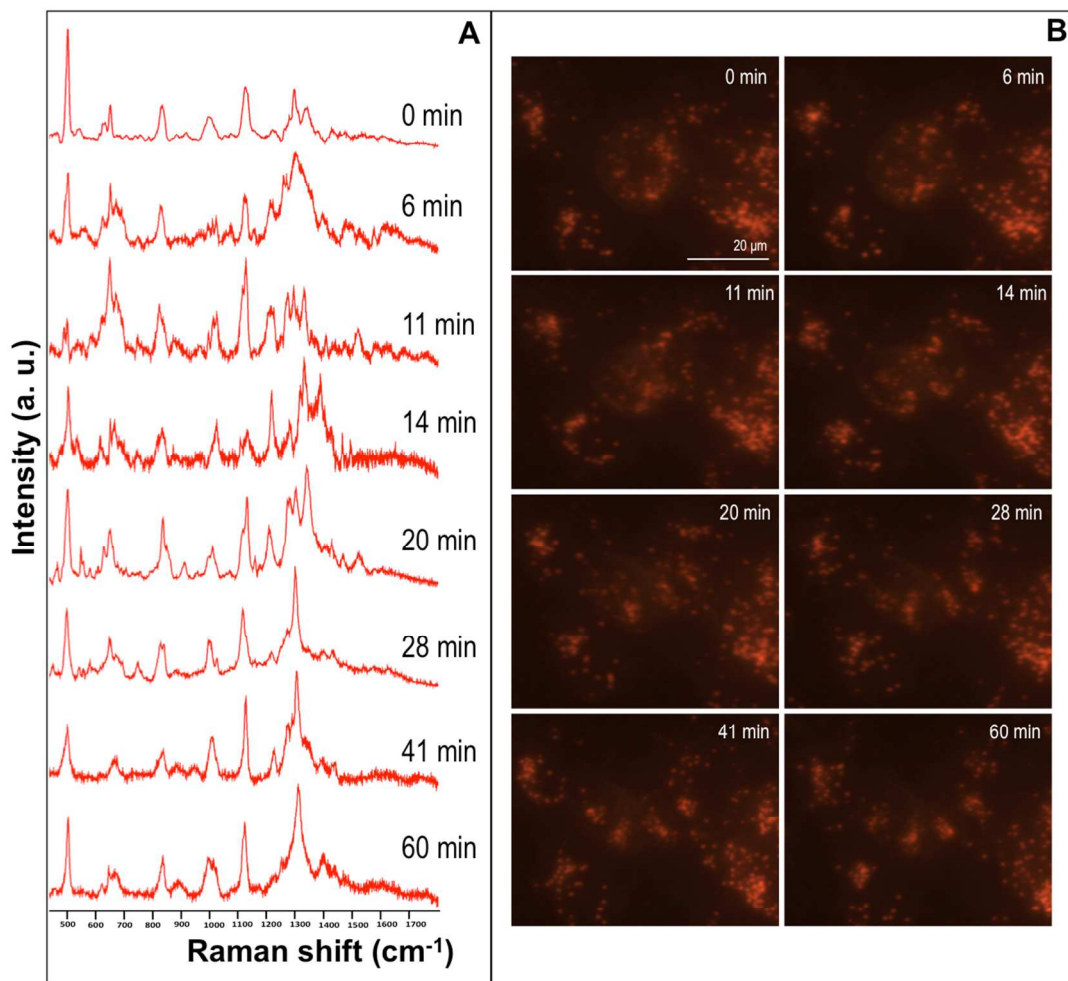

**Figure S6.** Time dependent SERS spectra collected from the HaCaT cells at different stages of mitosis (A). Dark-field images collected at respective time are also given (B).

## Supporting information 7

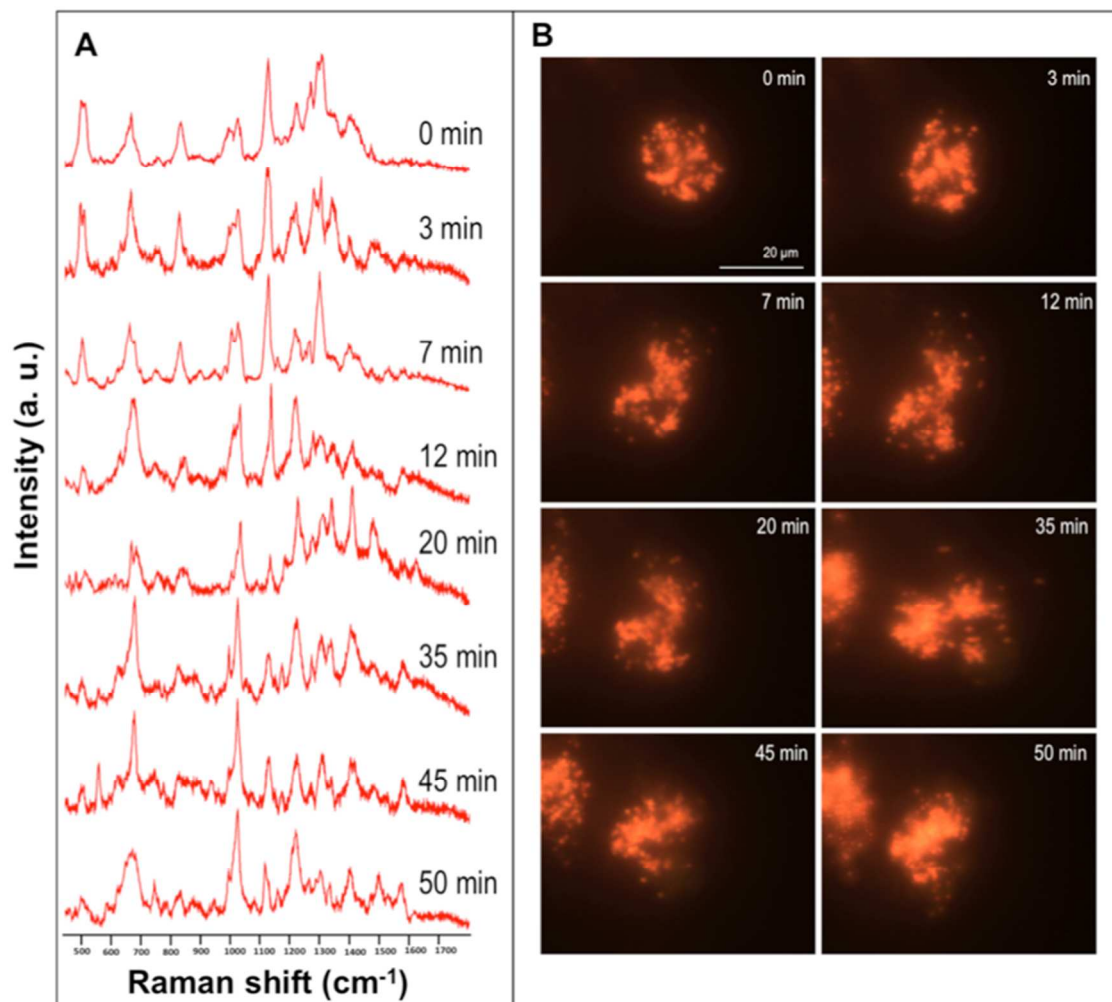

**Figure S7.** Time dependent SERS spectra collected from the HSC cells at different stages of cytokinesis failure process (A). Dark-field images collected at respective time are also given (B).

## Supporting information 8

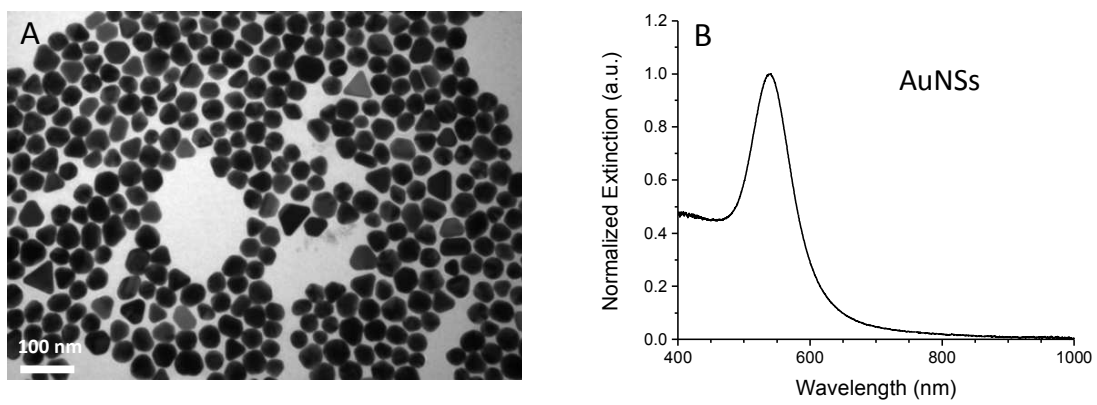

**Figure S8.** The TEM image (A) and extinction spectrum (B) of AuNSs.
